# Supplementary material for: Anisotropic nanoporous morphology of ZnO-supported Co that enhances catalytic activity
Source: Royal Society of Chemistry journal article supplement (doi:10.1039/d0nr08998b), 2021-01-01
Supplement: d0nr08998b1.pdf [file d0nr08998b1.pdf]

## Anisotropic Nanoporous Morphology of ZnO-Supported Co that Enhances Catalytic Activity

Christopher M. Coaty<sup>†#</sup>, Adam Corrao<sup>§±#</sup>, Victoria Petrova<sup>†#</sup>, Taewoo Kim<sup>‡</sup>, David P.

Fenning<sup>†‡‡</sup>, Peter Khalifah<sup>\*§±</sup>, Ping Liu<sup>\*†‡‡</sup>

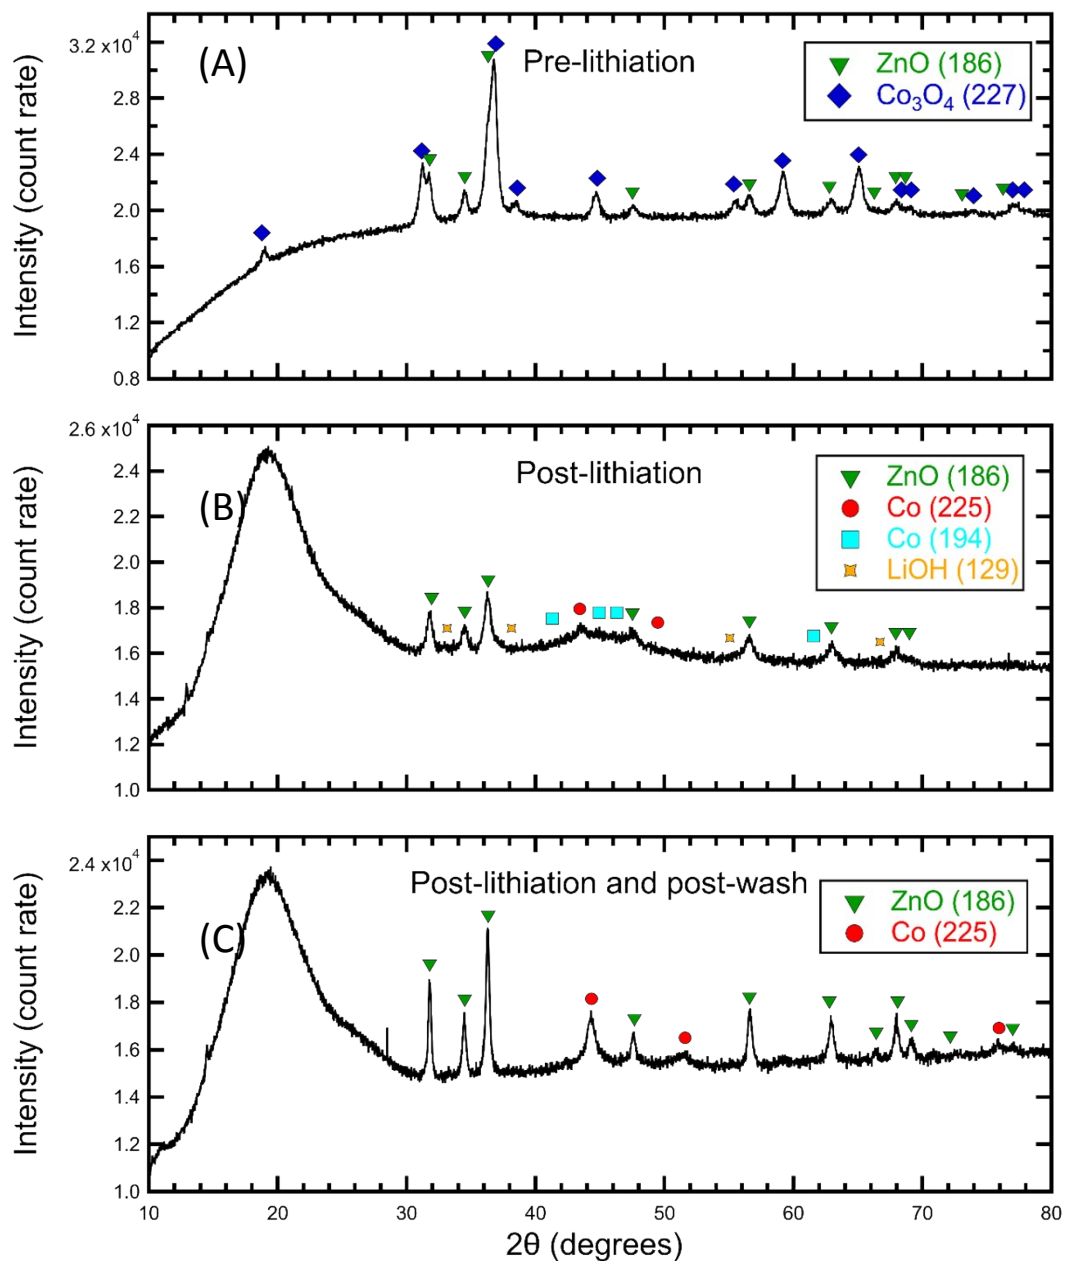

**Figure S1.** Phase identification results based on laboratory XRD patterns for (a) the pre-lithiation precursor mixture of ZnO and  $\text{Co}_3\text{O}_4$ , (b) the post-lithiation intermediate nanocomposite with a Li-containing phase, and (c) the post-lithiation and post-wash final NPo ZOC product.

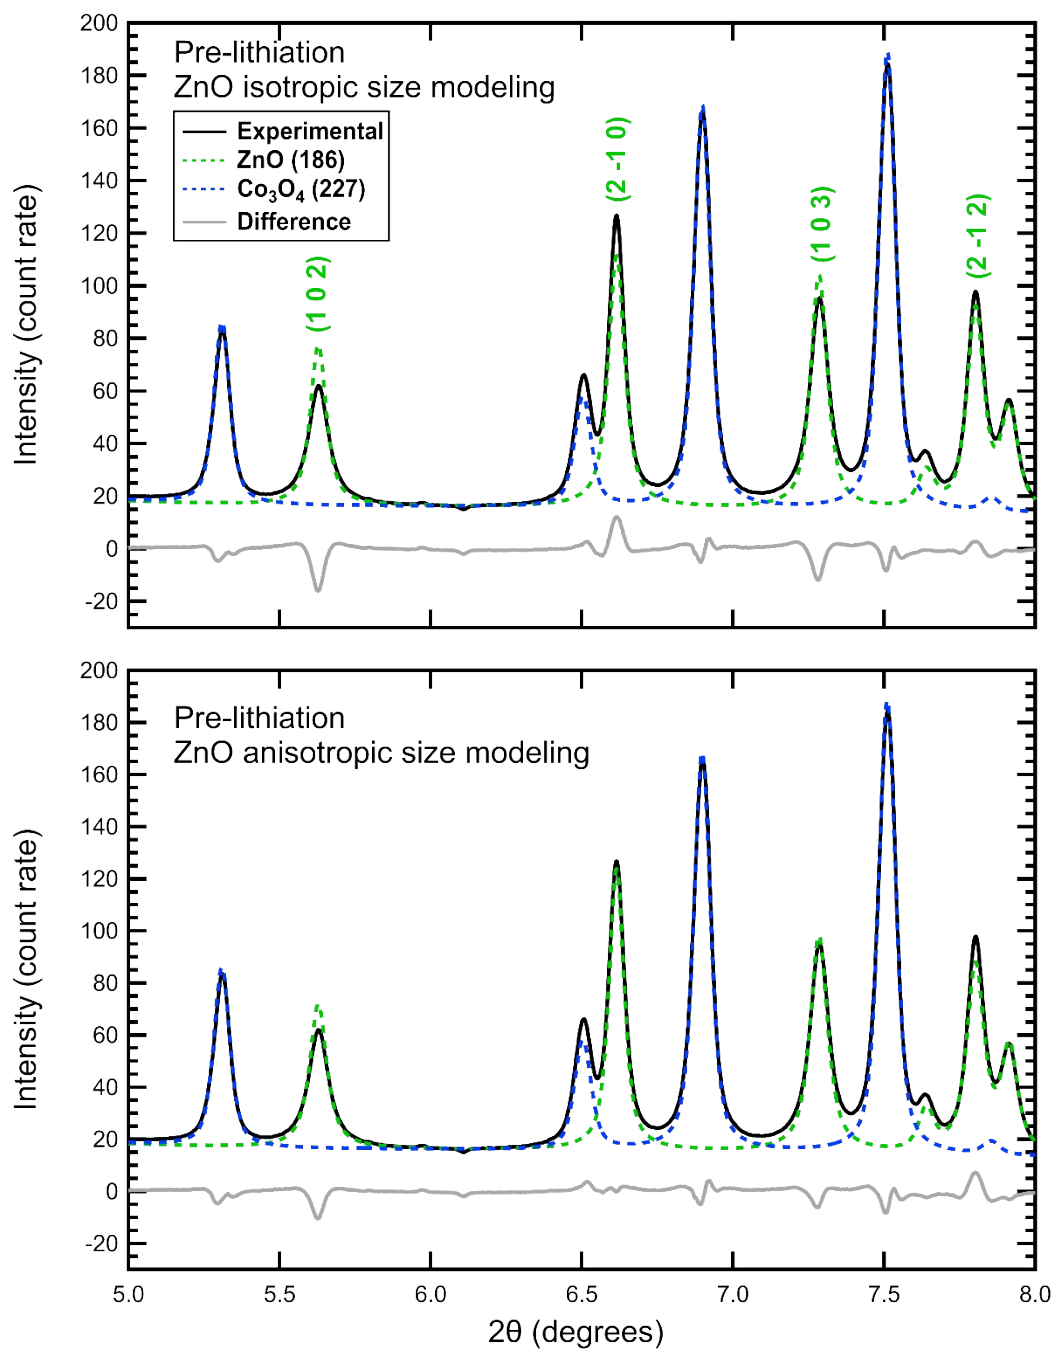

**Figure S2.** Comparisons of fit quality for XRD data of pre-lithiated sample for Rietveld refinements using isotropic size broadening (top,  $R_{wp} = 3.957$ ) and anisotropic size broadening (bottom,  $R_{wp} = 3.363$ ) for the ZnO phase.

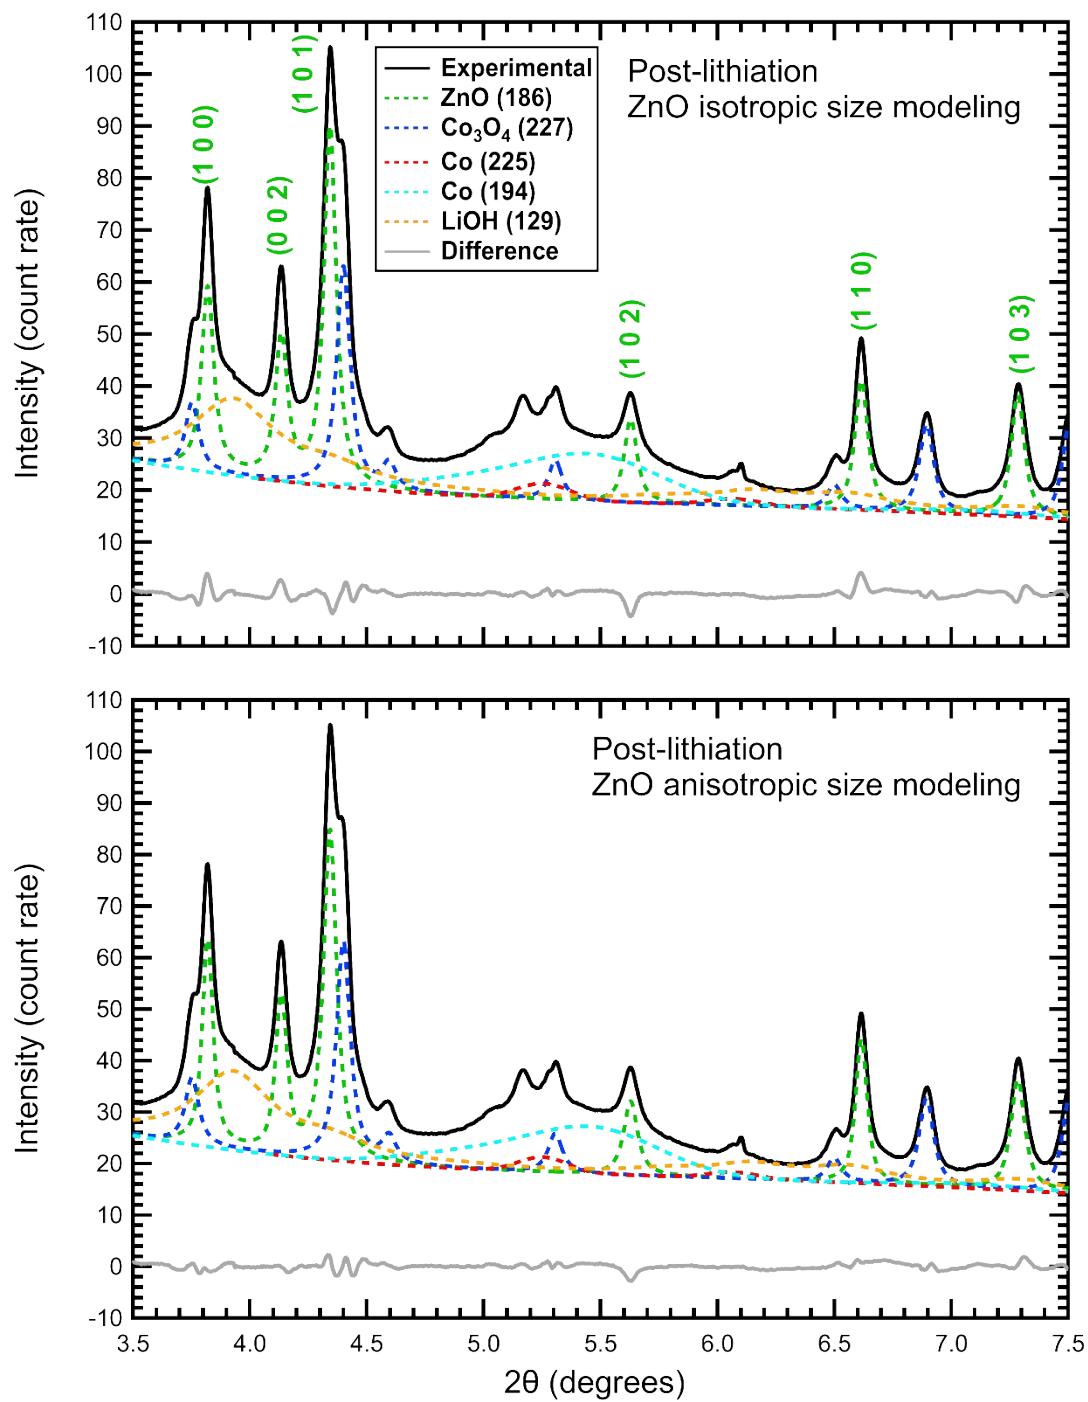

**Figure S3.** Comparisons of fit quality for XRD data of post-lithiated sample for Rietveld refinements using isotropic size broadening (top,  $R_{\text{wp}} = 2.029$ ) and anisotropic size broadening (bottom,  $R_{\text{wp}} = 1.790$ ) for the ZnO phase.

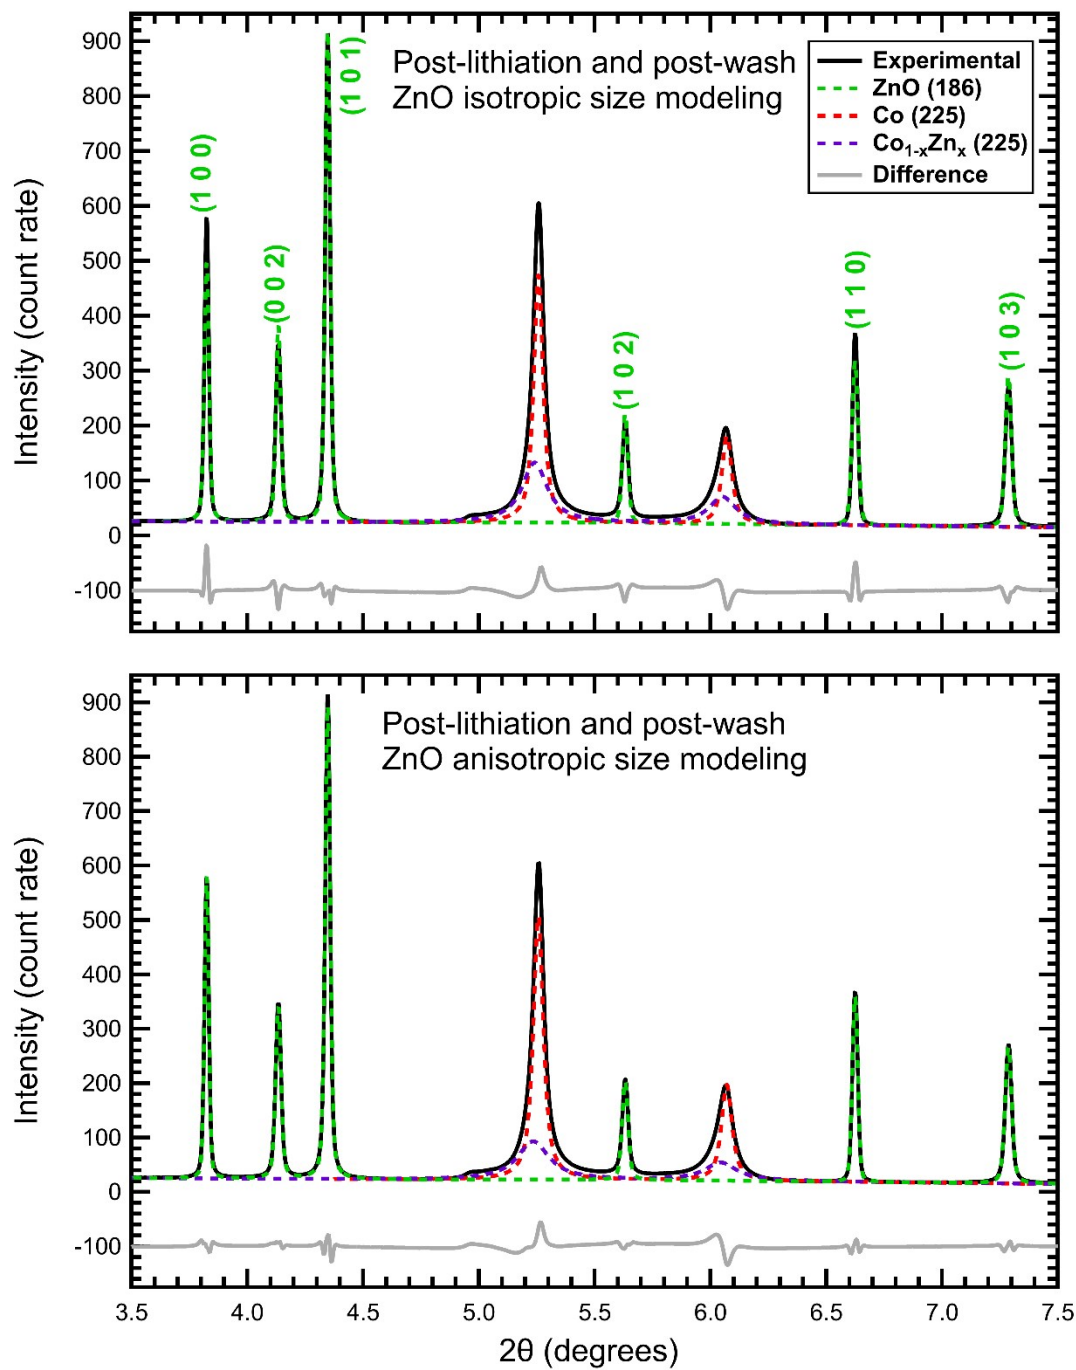

**Figure S4.** Comparisons of fit quality for XRD data of post-lithiated and post-washed sample for Rietveld refinements using isotropic size broadening (top,  $R_{\text{wp}} = 7.256$ ) and anisotropic size broadening (bottom,  $R_{\text{wp}} = 6.240$ ) for the ZnO phase.

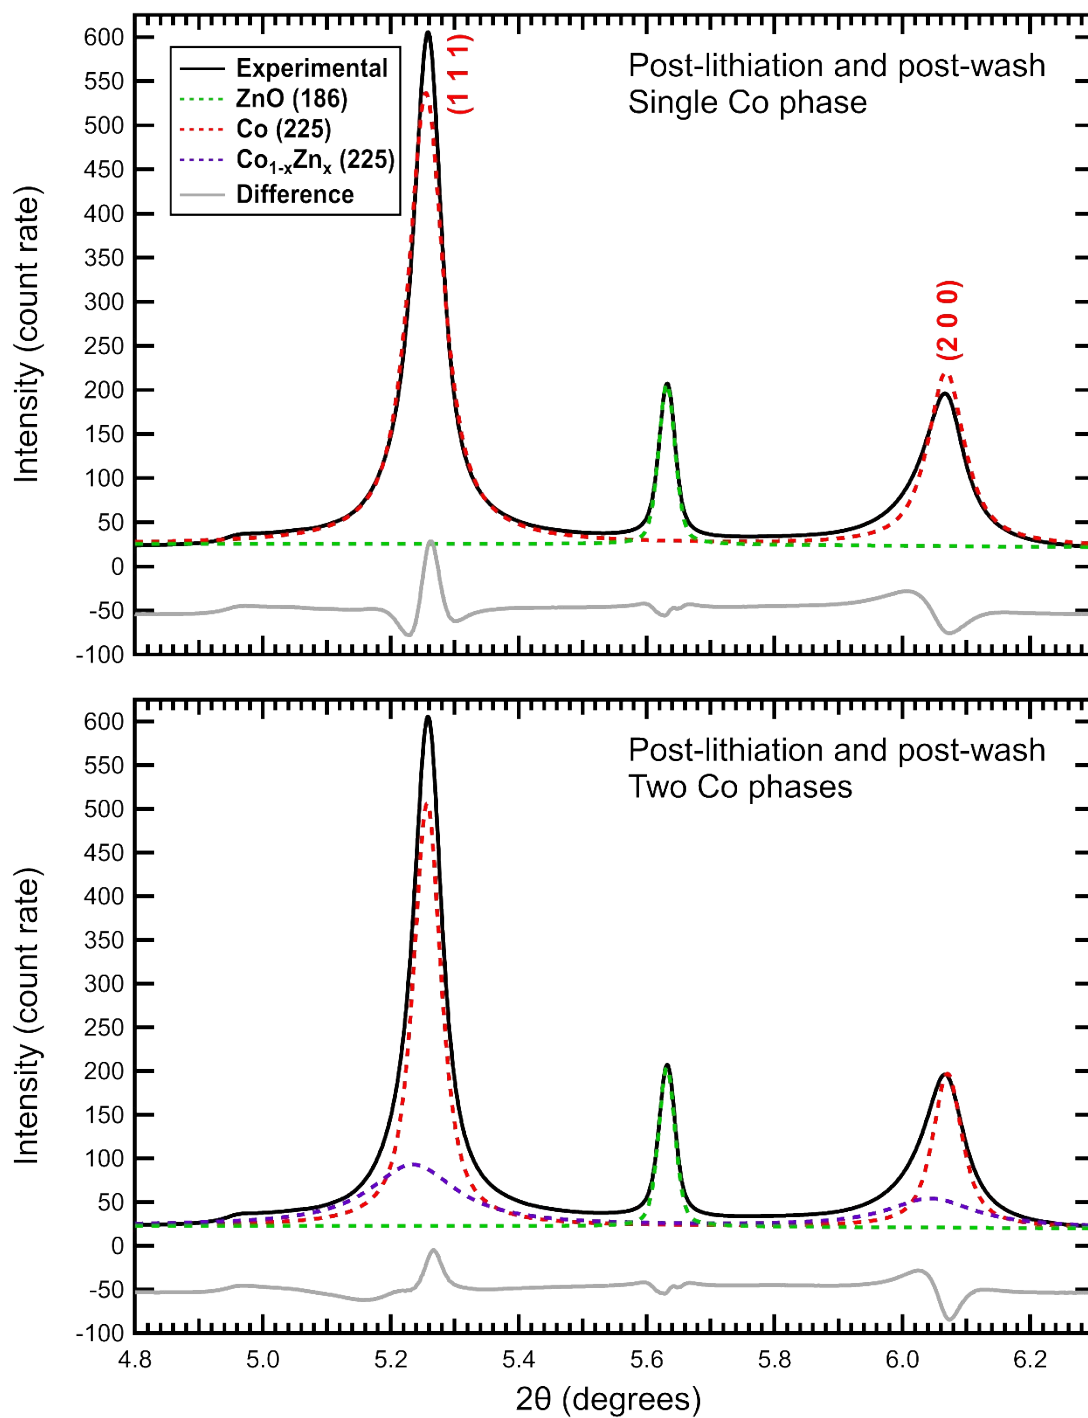

**Figure S5.** Comparisons of fit quality for XRD data of post-lithiated and post-washed sample for Rietveld refinements using a single Co phase (top,  $R_{wp} = 7.291$ ) and two Co phases (bottom,  $R_{wp} = 6.240$ ) where the second Co phase ( $\text{Co}_{1-x}\text{Zn}_x$ ) has 3% Zn substitution ( $x = 0.03$ ).

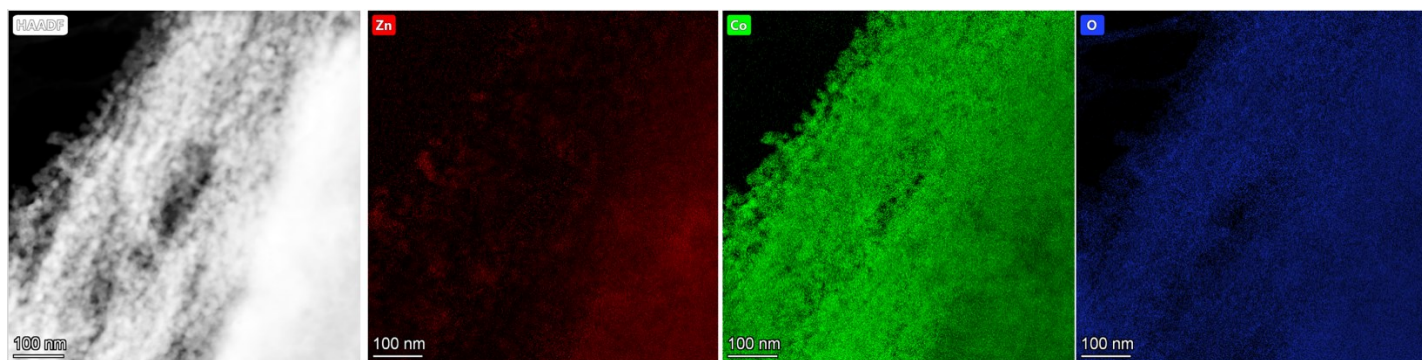

| Element | Atomic Fraction (%) | Atomic Error (%) | Mass Fraction (%) | Mass Error (%) | Fit error (%) |
|---------|---------------------|------------------|-------------------|----------------|---------------|
| C       | 4.29                | 0.60             | 1.16              | 0.09           | 2.31          |
| O       | 32.50               | 7.92             | 11.67             | 2.51           | 1.56          |
| Co      | <b>33.45</b>        | 6.43             | 44.25             | 6.83           | 0.65          |
| Cu      | 7.91                | 1.52             | 11.29             | 1.74           | 0.30          |
| Zn      | <b>21.29</b>        | 4.10             | 31.25             | 4.83           | 0.67          |

**Figure S6:** EDX mapping on a TEM image of nanoporous ZOC shows well integrated dispersion of Zn, Co and O elements and quantification by atomic fraction in the table below confirms a Co:Zn ratio of approximately 1.5:1.

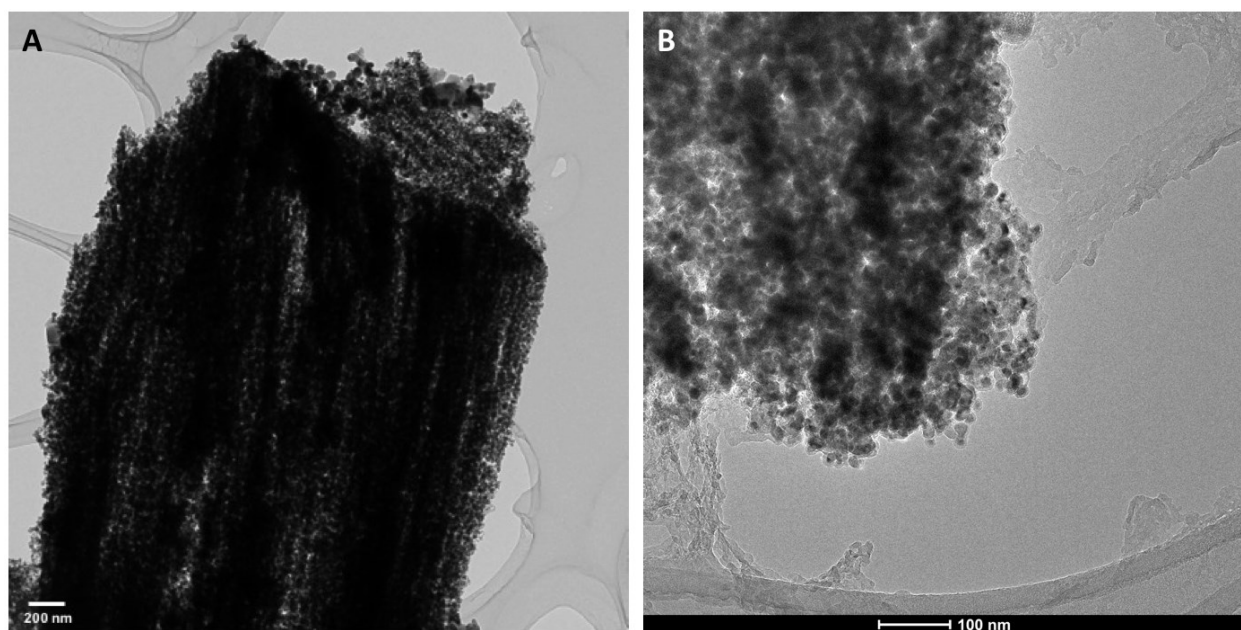

**Figure S7** Low resolution TEM images clearly show the anisotropic shape of the ZOC particles. (A) has a scalebar of 200nm and (B) has a scalebar of 100nm.

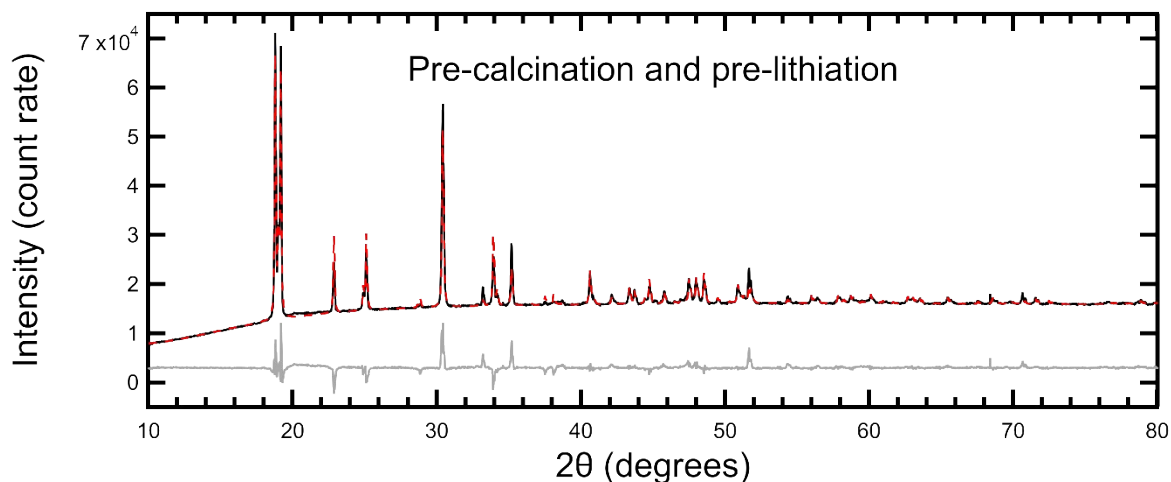

**Figure S8.** Rietveld fit ( $R_{wp} = 3.045$ ) for a lab XRD pattern of the pre-calcination precursor, which was determined to be a single phase metal oxalate dihydrate,  $\text{Co}_{1-x}\text{Zn}_x(\text{C}_2\text{O}_4)(\text{H}_2\text{O})_2$ , containing both Co and Zn ions mixed at an atomic scale. The Co:Zn ratio could not be directly quantified from diffraction studies, though  $x$  is presumed to be 0.5 based on the assumption of the complete incorporation of Co and Zn ions used in the synthesis of this phase.

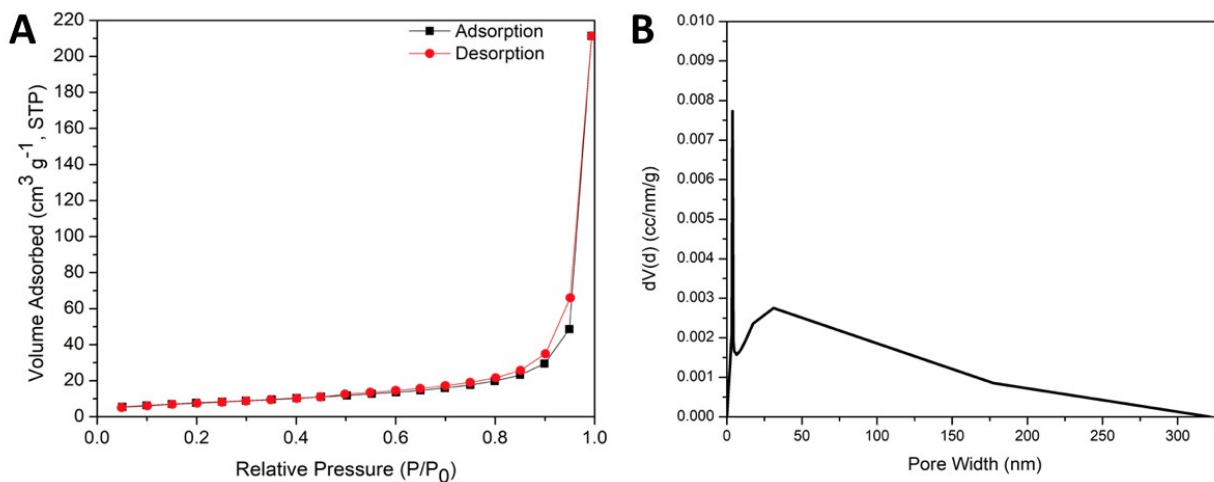

**Figure S9.** BET surface area and porosity data for ZOC. (A) Nitrogen adsorption-desorption isotherm; (B) BJH pore size distribution.

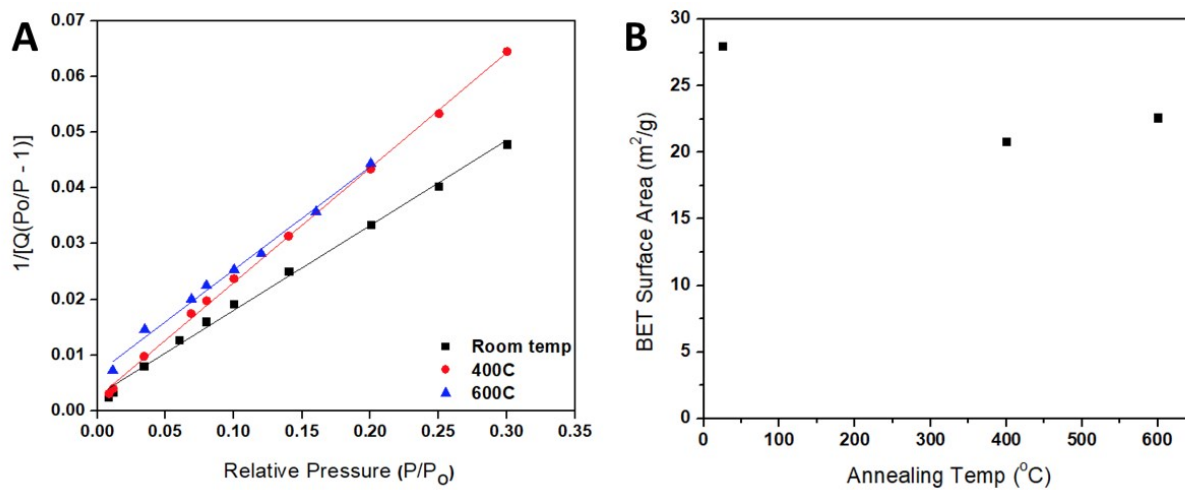

**Figure S10.** Nitrogen adsorption isotherms used to calculate BET surface area for ZOC at room temperature, 400C and 600C (A) as well as their corresponding trend in surface area (B).

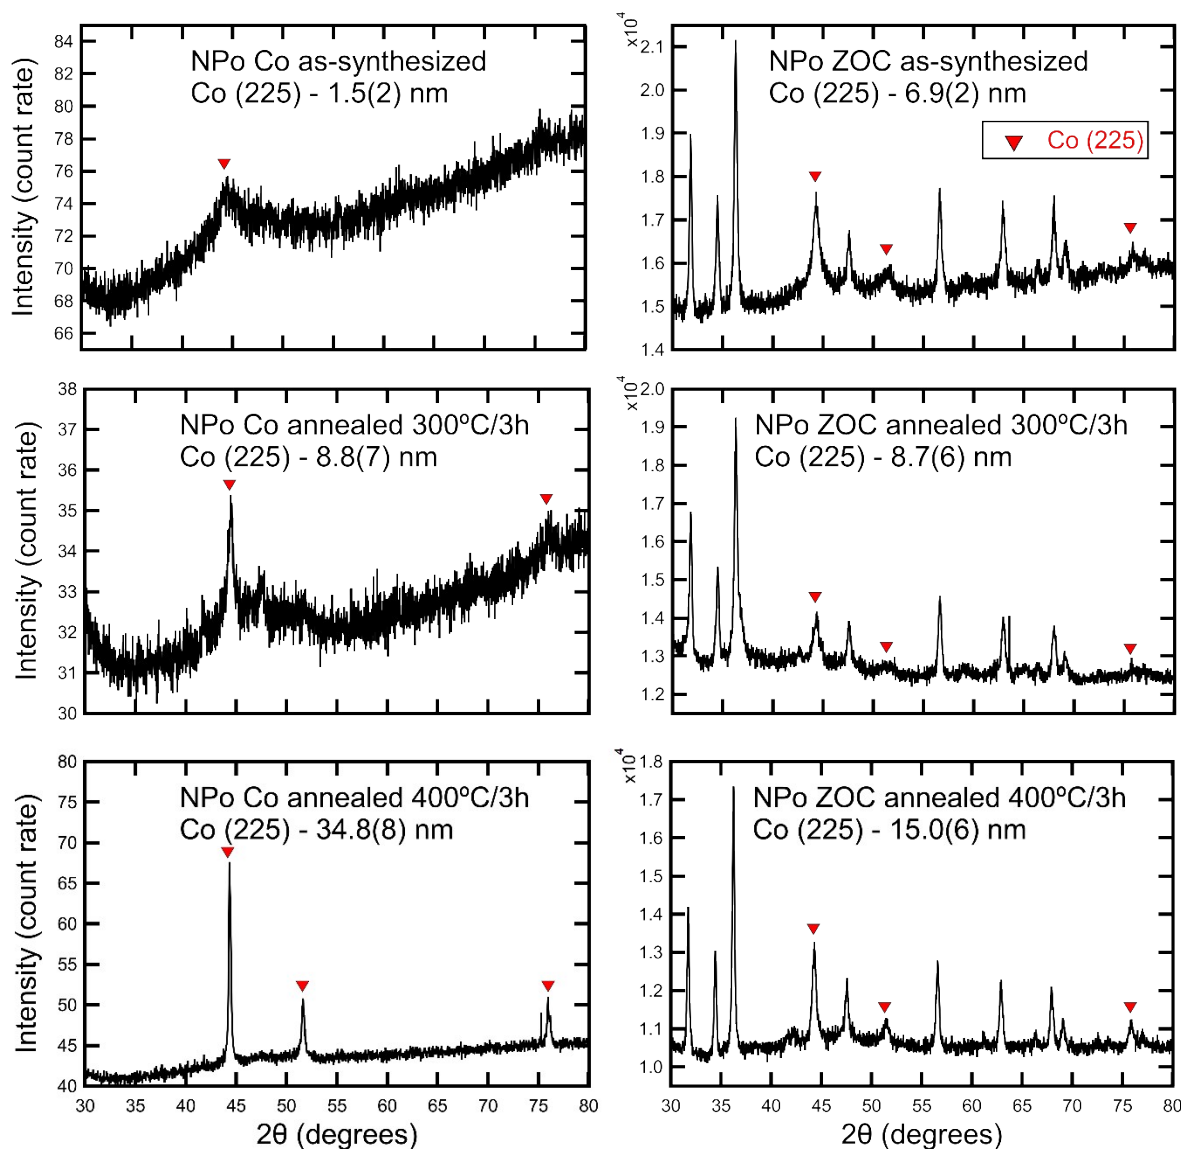

**Figure S11.** Comparisons of XRD data of (left) nanoporous Co metal and (right) nanoporous ZnO-supported Co, both shown for the as-synthesized samples (top), after annealing at 300 °C for 3 hours (middle), and after annealing at 400 °C for 3 hours (bottom). The enhanced resistance to coarsening of the hybrid Co-ZnO sample relative to pure nanoporous Co is reflected in its smaller particle size at 400 °C (15.0 vs. 34.8 nm).

**Table S1.** Lattice parameters (Å), phase fractions (weight %), and crystallite sizes (nm) calculated from Rietveld refinements for lab XRD patterns of nanoporous ZnO-Co annealed from 300 – 600 °C.

| Sample                                               | Phases<br>(space group)              | Lattice parameters (Å)                 | Phase Fractions<br>(wt. %) | Crystallite size<br>(nm) |
|------------------------------------------------------|--------------------------------------|----------------------------------------|----------------------------|--------------------------|
| Nanoporous<br>ZnO-Co<br><b>as-synthesized</b>        | ZnO (186)                            | $a = b = 3.2521(3)$<br>$c = 5.2064(5)$ | 54(3)                      | 19.9(3)                  |
|                                                      | Co (225)                             | $a = b = c = 3.5441(6)$                | 46(3)                      | <b>6.9(2)</b>            |
| Nanoporous<br>ZnO-Co<br><b>annealed<br/>300°C/3h</b> | ZnO (186)                            | $a = b = 3.2518(3)$<br>$c = 5.2051(5)$ | 55(3)                      | 19.9(3)                  |
|                                                      | Co (225)                             | $a = b = c = 3.5442(9)$                | 21(3)                      | <b>8.7(6)</b>            |
|                                                      | CoO (225)                            | $a = b = c = 4.245(3)$                 | 4(2)                       | 16(6)                    |
|                                                      | Co <sub>3</sub> O <sub>4</sub> (227) | $a = b = c = 8.101(3)$                 | 20(3)                      | 6.7(6)                   |
| Nanoporous<br>ZnO-Co<br><b>annealed<br/>400°C/3h</b> | ZnO (186)                            | $a = b = 3.2517(3)$<br>$c = 5.2034(4)$ | 65(2)                      | 26(1)                    |
|                                                      | Co (225)                             | $a = b = c = 3.5412(4)$                | 31(2)                      | <b>15.0(6)</b>           |
|                                                      | CoO (225)                            | $a = b = c = 4.282(2)$                 | 4(1)                       | 24(8)                    |
| Nanoporous<br>ZnO-Co<br><b>annealed<br/>500°C/3h</b> | ZnO (186)                            | $a = b = 3.2529(3)$<br>$c = 5.2042(5)$ | 66(1)                      | 26(1)                    |
|                                                      | Co (225)                             | $a = b = c = 3.5436(3)$                | 30(1)                      | <b>21.3(7)</b>           |
|                                                      | CoO (225)                            | $a = b = c = 4.265(2)$                 | 4(1)                       | 31(10)                   |
| Nanoporous<br>ZnO-Co<br><b>annealed<br/>600°C/3h</b> | ZnO (186)                            | $a = b = 3.2527(4)$<br>$c = 5.2046(7)$ | 60(2)                      | 25(2)                    |
|                                                      | Co (225)                             | $a = b = c = 3.5444(4)$                | 31(2)                      | <b>20.5(8)</b>           |
|                                                      | CoO (225)                            | $a = b = c = 4.264(1)$                 | 9(2)                       | 25(5)                    |

**Table S2.** Gas composition over time from catalytic testing with the NPo ZOC.

| <b>Time<br/>(min.)</b> | <b>H<sub>2</sub><br/>(mol %)</b> | <b>CO<sub>2</sub><br/>(mol %)</b> | <b>CO<br/>(mol %)</b> | <b>CH<sub>4</sub><br/>(mol %)</b> | <b>H<sub>2</sub><br/>(ppm)</b> | <b>CO<sub>2</sub><br/>(ppm)</b> | <b>CO<br/>(ppm)</b> | <b>CH<sub>4</sub><br/>(ppm)</b> |
|------------------------|----------------------------------|-----------------------------------|-----------------------|-----------------------------------|--------------------------------|---------------------------------|---------------------|---------------------------------|
| 0                      | 0                                | 0                                 | 0                     | 0                                 | 0                              | 0                               | 0                   | 0                               |
| 60                     | 66                               | 32.6                              | 1.2                   | 0.3                               | 20063                          | 9899                            | 360                 | 85                              |
| 120                    | 65.1                             | 20                                | 2.8                   | 12.2                              | 53147                          | 16635                           | 2329                | 10120                           |
| 180                    | 66.4                             | 19.3                              | 2.9                   | 11.4                              | 52965                          | 15405                           | 2316                | 9073                            |
| 240                    | 66.7                             | 21                                | 2.8                   | 9.5                               | 47045                          | 14818                           | 1966                | 6729                            |
| 300                    | 67.3                             | 19.1                              | 3                     | 10.6                              | 50724                          | 14403                           | 2274                | 7905                            |
| 360                    | 70.3                             | 19.5                              | 2.6                   | 7.6                               | 51369                          | 14282                           | 1880                | 5550                            |

**Table S3.** Reactant gas mixture flow rate (mL/min), production of H<sub>2</sub> and CO<sub>2</sub> (ppm) for both the standard ZOC catalyst and the NPo ZOC catalyst, and factor of increased H<sub>2</sub> and CO<sub>2</sub> production for the NPo ZOC catalyst.

| <b>Reactant<br/>Gas<br/>Mixture<br/>Flow<br/>Rate<br/>(mL/min)</b> | <b>NPo ZOC<br/>H<sub>2</sub> Production<br/>(ppm)</b> | <b>NPo ZOC<br/>CO<sub>2</sub><br/>Production<br/>(ppm)</b> | <b>Standard<br/>ZOC<br/>H<sub>2</sub><br/>Production<br/>(ppm)</b> | <b>Standard<br/>ZOC<br/>CO<sub>2</sub><br/>Production<br/>(ppm)</b> | <b>Factor of<br/>increased<br/>H<sub>2</sub><br/>production<br/>(NPo ZOC /<br/>Standard<br/>ZOC)</b> | <b>Factor of<br/>increased<br/>CO<sub>2</sub><br/>production<br/>(NPo ZOC<br/>/ Standard<br/>ZOC)</b> |
|--------------------------------------------------------------------|-------------------------------------------------------|------------------------------------------------------------|--------------------------------------------------------------------|---------------------------------------------------------------------|------------------------------------------------------------------------------------------------------|-------------------------------------------------------------------------------------------------------|
| 50                                                                 | 2364.99                                               | 714.18                                                     | 628.16                                                             | 539.3547                                                            | 3.76                                                                                                 | 1.32                                                                                                  |
| 80                                                                 | 420.88                                                | 400.73                                                     | 122.95                                                             | 202.6407                                                            | 3.42                                                                                                 | 1.98                                                                                                  |
| 110                                                                | 280.41                                                | 254.84                                                     | 41                                                                 | 73.3644                                                             | 6.84                                                                                                 | 3.47                                                                                                  |
| 160                                                                | 118.46                                                | 118.62                                                     | 30.3                                                               | 69.298                                                              | 3.92                                                                                                 | 1.71                                                                                                  |
| 210                                                                | 30.31                                                 | 51.6272                                                    | N/A                                                                | N/A                                                                 | N/A                                                                                                  | N/A                                                                                                   |

**Table S4.** Positions and *d*-spacings for unindexed peaks in the XRD data from the pre-lithiation precursor mixture of ZnO and Co<sub>3</sub>O<sub>4</sub>.

| <b>2<math>\theta</math> Position (deg.)</b> | <b><i>d</i>-spacing (Å)</b> |
|---------------------------------------------|-----------------------------|
| 1.64250                                     | 6.51293                     |
| 1.98609                                     | 5.38629                     |
| 2.62000                                     | 4.08323                     |
| 3.25585                                     | 3.28595                     |
| 3.28863                                     | 3.25320                     |
| 3.50686                                     | 3.05081                     |

**Table S5.** Positions and *d*-spacings for unindexed peaks in the XRD data from the post-lithiated hybrid nanocomposite sample.

| <b>2<math>\theta</math> Position (deg.)</b> | <b><i>d</i>-spacing (Å)</b> |
|---------------------------------------------|-----------------------------|
| 3.20000                                     | 3.34329                     |
| 4.99940                                     | 2.14036                     |
| 5.15084                                     | 2.07747                     |
| 6.02908                                     | 1.77507                     |
| 6.07870                                     | 1.76060                     |
| 8.54158                                     | 1.25352                     |
| 8.92742                                     | 1.19945                     |
